# Supplementary material
Source: HighWire-hosted journal article supplement (https://bmjopen.bmj.com/content/11/3/e041393)
Supplement: inline-supplementary-material-1 [file inline-supplementary-material-1.pdf]

Supplementary Table 1 Search strategy of Medline

| #   | Searches             |
|-----|----------------------|
| 1   | Probiotics           |
| 2   | Probiotic supplement |
| 3   | Bone                 |
| 4   | Osteoporosis         |
| 5.  | Osteopenia           |
| 6.  | Bone mineral density |
| 7.  | Bone turnover        |
| 8.  | Postmenopausal       |
| 9.  | 1 and 3 and 8        |
| 10. | 1 and 4 and 8        |
| 11. | 1 and 5 and 8        |
| 12. | 1 and 6 and 8        |
| 13. | 1 and 7 and 8        |
| 14. | 2 and 3 and 8        |
| 15. | 2 and 4 and 8        |
| 16. | 2 and 5 and 8        |
| 17. | 2 and 6 and 8        |
| 18. | 2 and 7 and 8        |

The same strategy for other databases
