# Supplementary material
Source: HighWire-hosted journal article supplement (https://bmjopen.bmj.com/content/11/3/e041393)

### Meta-analysis random-effects estimates (linear form)

Study omitted

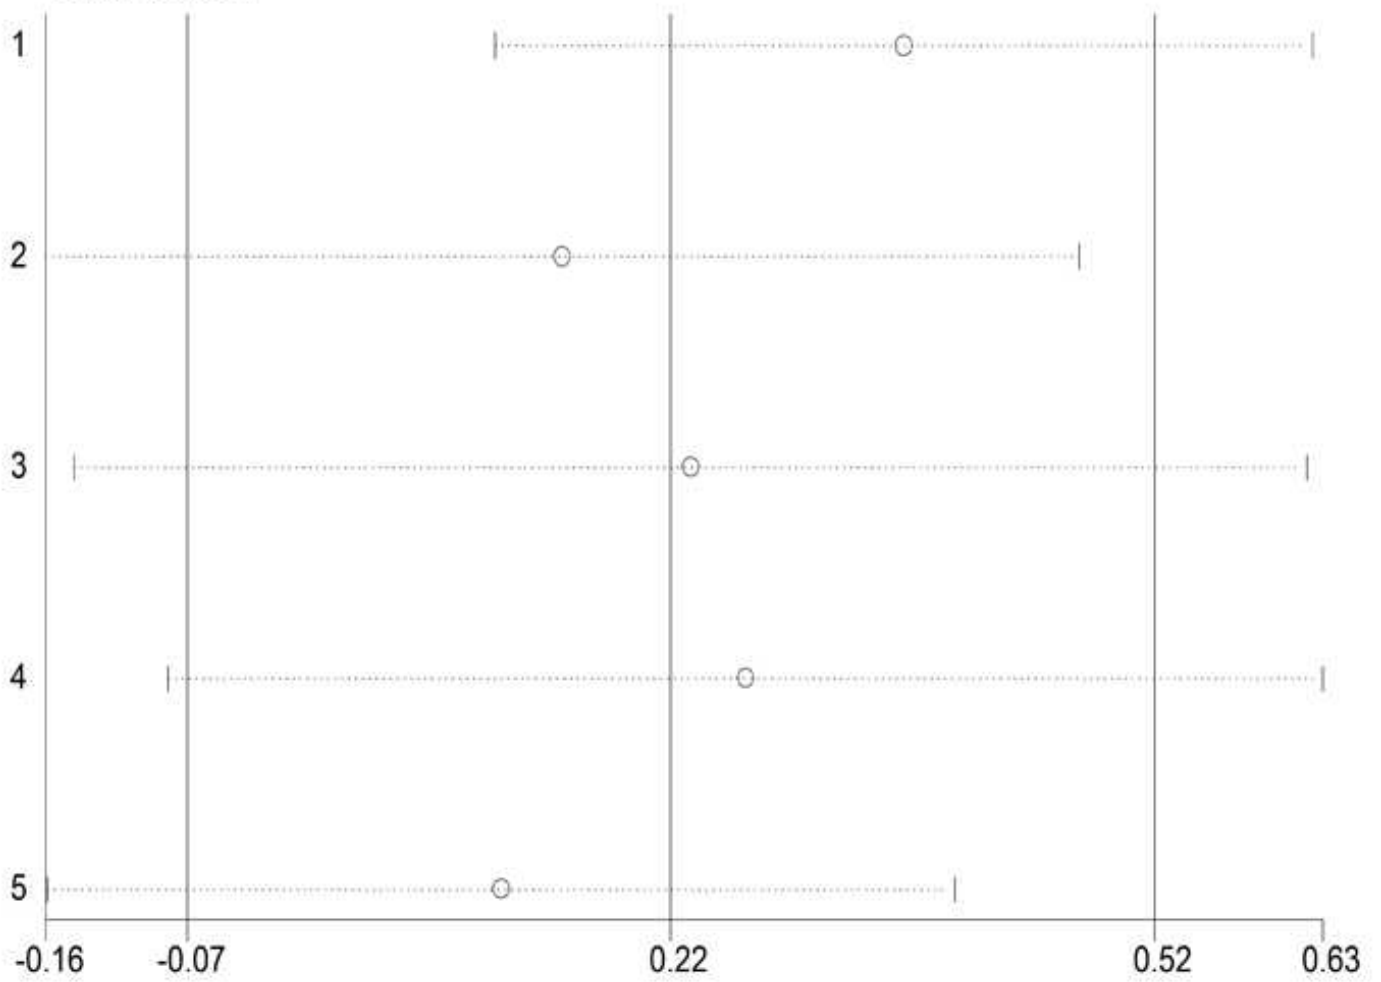

Supplement: inline-supplementary-material-7 [file inline-supplementary-material-7.pdf]
